# Supplementary material for: Disulfide-activated protein kinase G Iα regulates cardiac diastolic relaxation and fine-tunes the Frank–Starling response
Source: PubMed Central journal article supplement (PMC5095173; doi:10.1038/ncomms13187), 2016-10-26
Supplement: ncomms13187-s1.pdf [file ncomms13187-s1.pdf]

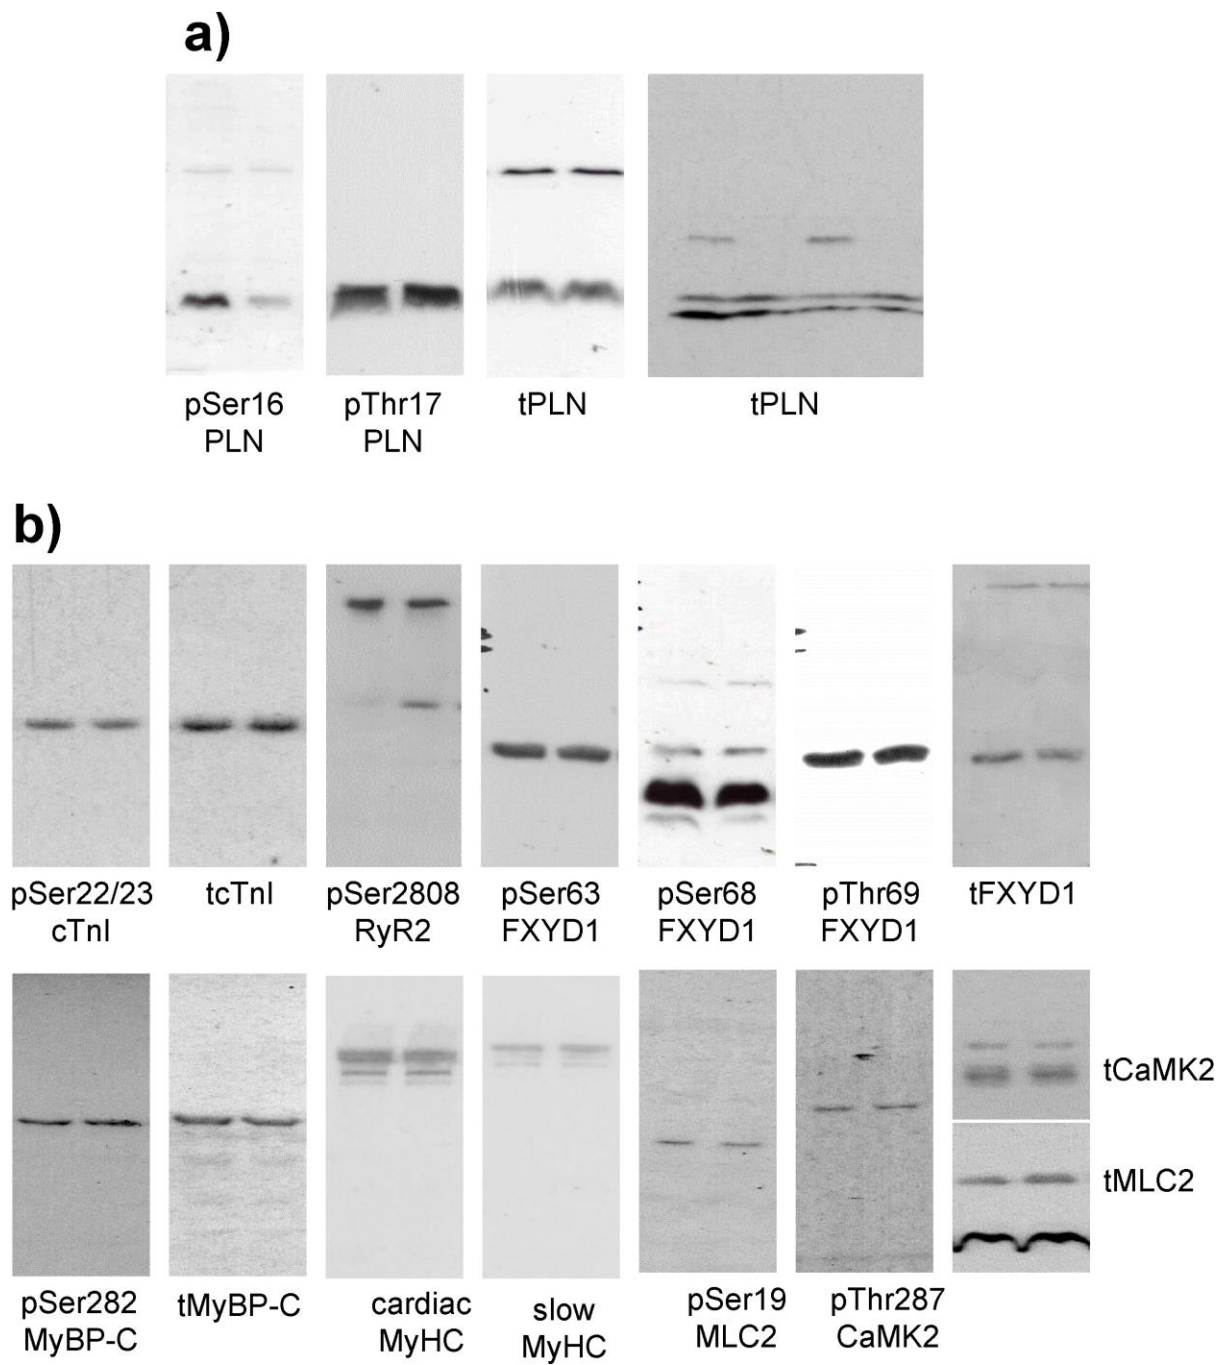

**Supplementary Figure 1** Uncropped scanned images of key western blots from Figure 1. Uncropped blots used in Figure 1 (a-b).

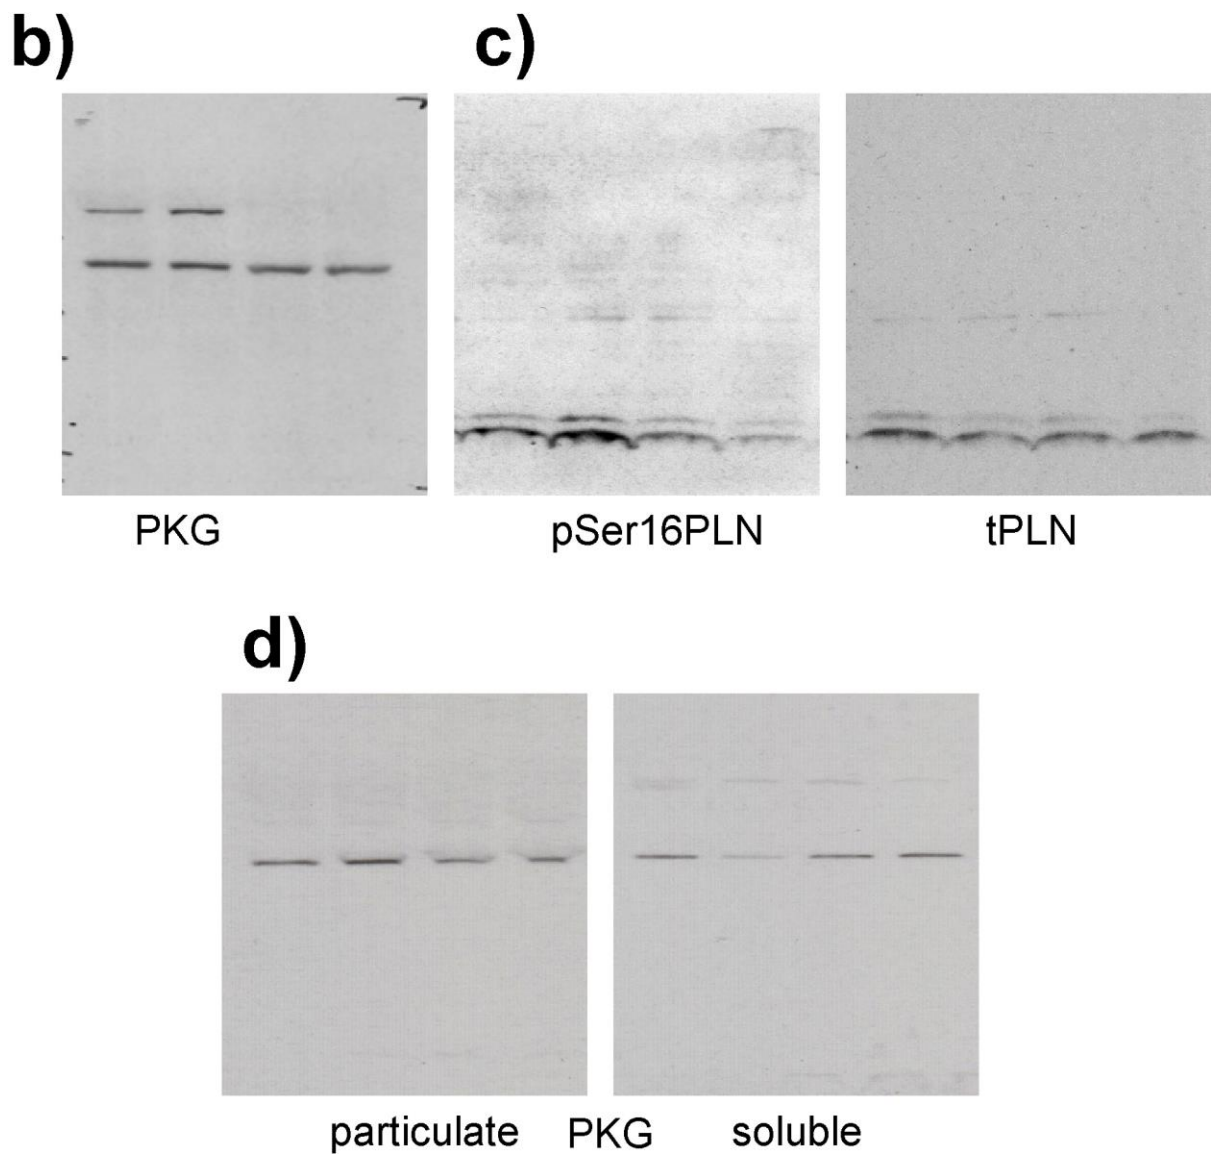

**Supplementary Figure 2** Uncropped scanned images of key western blots from Figure 2. Uncropped blots used in Figure 2 (b-d).

**Supplementary Table 1.** Echocardiography measurements from WT and C42S PKG1 $\alpha$  KI mice.

|                                                 | WT                | C42S PKG KI        |          |
|-------------------------------------------------|-------------------|--------------------|----------|
|                                                 | n=13              | n=14               |          |
| Body weight, g                                  | 28.2 $\pm$ 0.45   | 27.6 $\pm$ 0.30    | ns       |
| Heart Rate, bpm                                 | 549 $\pm$ 5.82    | 540 $\pm$ 4.72     | ns       |
| Intraventricular septum diastolic thickness, mm | 0.86 $\pm$ 0.03   | 0.82 $\pm$ 0.03    | ns       |
| LV diastolic dimension, mm                      | 4.22 $\pm$ 0.07   | 3.86 $\pm$ 0.07    | p<0.01   |
| Posterior wall diastolic thickness, mm          | 0.86 $\pm$ 0.04   | 0.89 $\pm$ 0.06    | ns       |
| Anterior wall diastolic thickness, mm           | 0.86 $\pm$ 0.04   | 0.81 $\pm$ 0.03    | ns       |
| Intraventricular septum systolic thickness, mm  | 1.36 $\pm$ 0.05   | 1.25 $\pm$ 0.04    | ns       |
| LV systolic dimension, mm                       | 2.61 $\pm$ 0.08   | 2.53 $\pm$ 0.06    | ns       |
| Posterior wall systolic thickness, mm           | 1.31 $\pm$ 0.06   | 1.31 $\pm$ 0.05    | ns       |
| Anterior wall systolic thickness, mm            | 1.32 $\pm$ 0.04   | 1.24 $\pm$ 0.06    | ns       |
| Diastolic endocardial area, mm <sup>2</sup>     | 25.4 $\pm$ 0.91   | 20.8 $\pm$ 0.85    | p<0.01   |
| Systolic endocardial area, mm <sup>2</sup>      | 15.3 $\pm$ 0.92   | 13.9 $\pm$ 0.3     | ns       |
| Diastolic epicardial area, mm <sup>2</sup>      | 42.6 $\pm$ 1.14   | 37.7 $\pm$ 0.92    | p<0.01   |
| Systolic epicardial area, mm <sup>2</sup>       | 34.1 $\pm$ 1.00   | 32.2 $\pm$ 0.48    | ns       |
| LV systolic volume, $\mu$ L                     | 25.5 $\pm$ 1.94   | 23.6 $\pm$ 1.54    | ns       |
| LV diastolic volume, $\mu$ L                    | 80.1 $\pm$ 3.00   | 67.1 $\pm$ 1.85    | p<0.01   |
| Stroke volume, $\mu$ L                          | 54.5 $\pm$ 1.47   | 43.5 $\pm$ 1.17    | p<0.0001 |
| Ejection Fraction, %                            | 68.6 $\pm$ 1.23   | 66.52 $\pm$ 0.98   | ns       |
| Fractional Shortening, %                        | 37.6 $\pm$ 1.32   | 36.7 $\pm$ 1.27    | ns       |
| Cardiac output, mL/min                          | 29.3 $\pm$ 0.79   | 23.2 $\pm$ 0.64    | p<0.0001 |
| LV Mass, mg                                     | 115.3 $\pm$ 2.14  | 114.5 $\pm$ 3.35   | ns       |
| AV Peak velocity, mm/s                          | 1876.4 $\pm$ 56.2 | 1798.3 $\pm$ 131.8 | ns       |

|                                      |              |              |         |
|--------------------------------------|--------------|--------------|---------|
| Ao Velocity time integral, cm        | 6.06 ± 0.17  | 5.97 ± 0.50  | ns      |
| Transmitral E wave velocity (mm/s)   | 953.4 ± 19.7 | 820.9 ± 18.9 | p<0.01  |
| Transmitral A wave velocity (mm/s)   | 519.5 ± 19.4 | 609.9 ± 19.9 | p<0.05  |
| E/A ratio                            | 1.84 ± 0.05  | 1.35 ± 0.03  | p<0.001 |
| Mitral annulus motion e' wave (mm/s) | 31.8 ± 0.58  | 27.7 ± 0.80  | p<0.05  |
| Mitral annulus motion a' wave (mm/s) | 16.9 ± 0.54  | 18.4 ± 0.42  | p<0.05  |
| e'/a' ratio                          | 1.89 ± 0.09  | 1.51 ± 0.06  | p<0.05  |

**Supplementary Table 2.** Pressure-volume measurements from WT and C42S PKG1 $\alpha$  KI mice.

|                               | WT                   | C42S PKG KI         |        |
|-------------------------------|----------------------|---------------------|--------|
|                               | n=9                  | n=10                |        |
| Body weight, g                | 28.1 $\pm$ 0.8       | 28.8 $\pm$ 1.0      | ns     |
| Heart Rate, bpm               | 551 $\pm$ 12.7       | 563 $\pm$ 21.6      | ns     |
| End diastolic pressure, mmHg  | 3.2 $\pm$ 0.1        | 6.0 $\pm$ 1.1       | p<0.05 |
| End systolic pressure, mmHg   | 90.5 $\pm$ 3.6       | 91.5 $\pm$ 2.9      | ns     |
| LV developed pressure, mmHg   | 101.1 $\pm$ 2.5      | 96.0 $\pm$ 2.5      | ns     |
| Mean pressure, mmHg           | 39.0 $\pm$ 1.4       | 46.4 $\pm$ 1.5      | p<0.05 |
| End systolic volume, $\mu$ L  | 13.6 $\pm$ 1.5       | 14.1 $\pm$ 2.6      | ns     |
| End diastolic volume, $\mu$ L | 34.5 $\pm$ 2.3       | 33.9 $\pm$ 3.1      | ns     |
| Stroke work, mmHg. $\mu$ L    | 2383.8 $\pm$ 121.0   | 2268.5 $\pm$ 138.7  | ns     |
| Ejection Fraction, %          | 84.9 $\pm$ 4.4       | 76.3 $\pm$ 7.7      | ns     |
| dP/dt max, mmHg/s             | 9603.8 $\pm$ 299.6   | 8528.9 $\pm$ 279.5  | p<0.05 |
| dP/dt min, mmHg/s             | -10624.9 $\pm$ 389.4 | -8900.6 $\pm$ 586.9 | p<0.05 |
| Tau (Weiss), ms               | 5.35 $\pm$ 0.23      | 6.30 $\pm$ 0.33     | p<0.05 |
